# Supplementary material for: TGF-β1 enhances FOXO3 expression in human synovial fibroblasts by inhibiting miR-92a through AMPK and p38 pathways
Source: publisher site journal article supplement (doi:10.18632/aging.102038), 2019-06-21
Supplement: Supplementary file [file aging-v11i12-102038-supplementary-material-SD1.pdf]

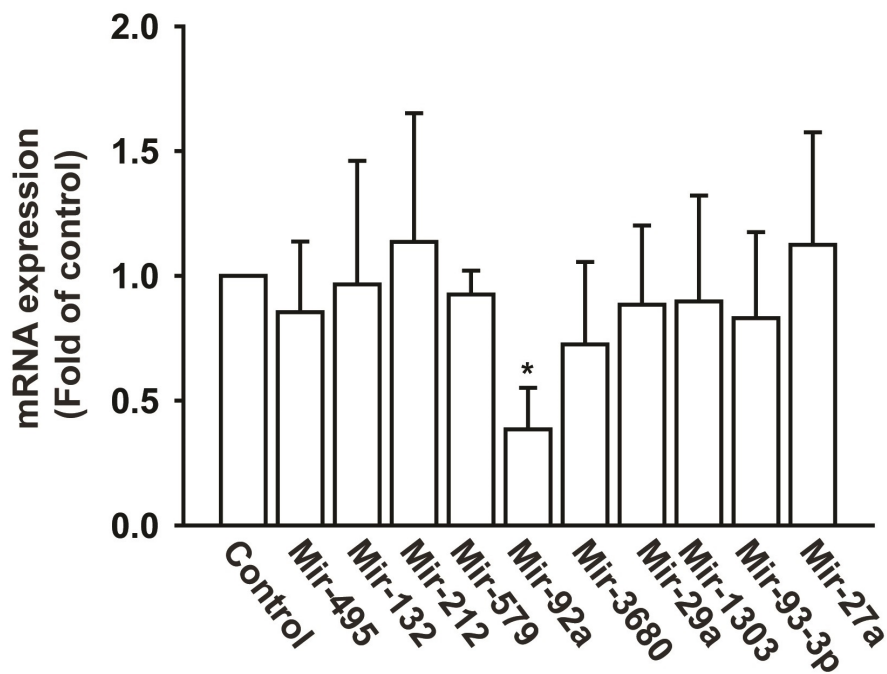

**Figure S1. The TGF- $\beta$ 1 inhibits miR-92a expression.** OASFs were incubated with TGF- $\beta$ 1 (10 ng/ml) for 24 h. The miRNA expression was examined by qPCR. Results are expressed as the mean  $\pm$  SEM. \* $p < 0.05$  as compared with the control group.

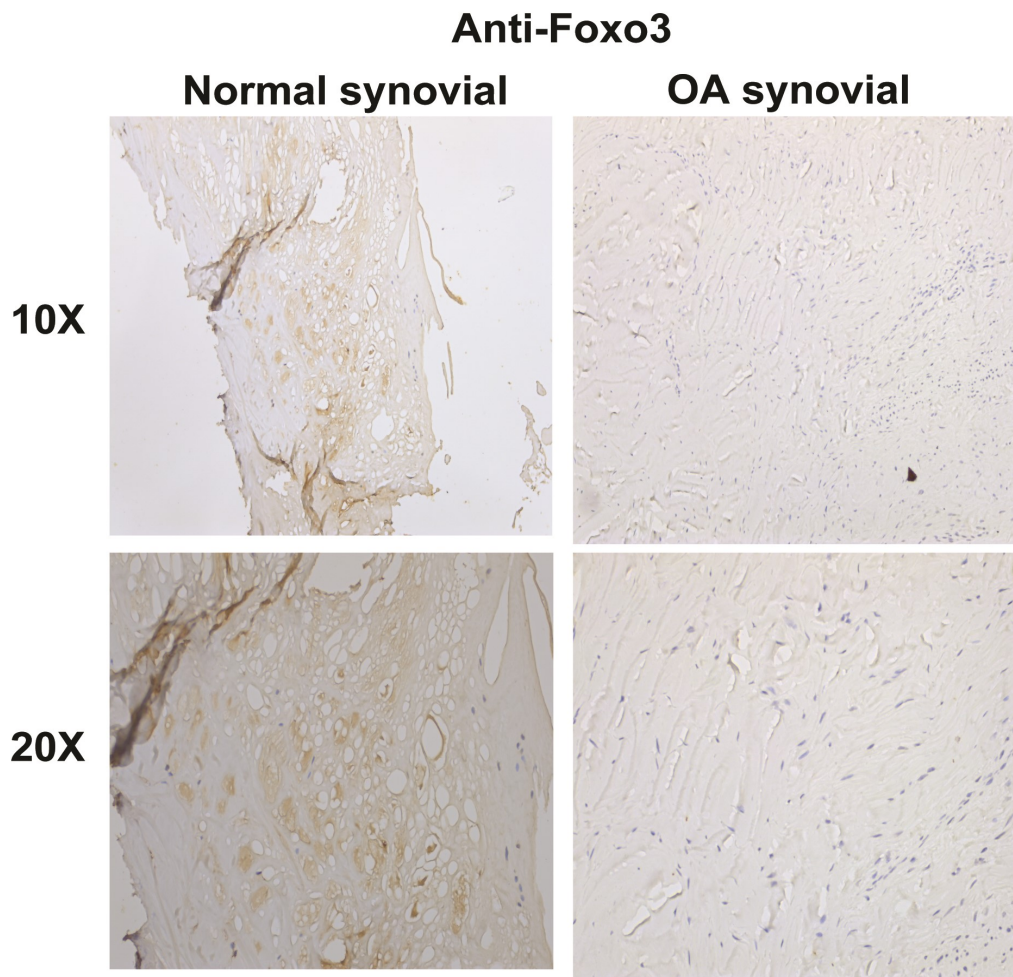

**Figure S2. The FOXO3 expression in normal and OA patients.** The normal and OA specimens were immunostained (IHC) with anti-FOXO3 antibody.

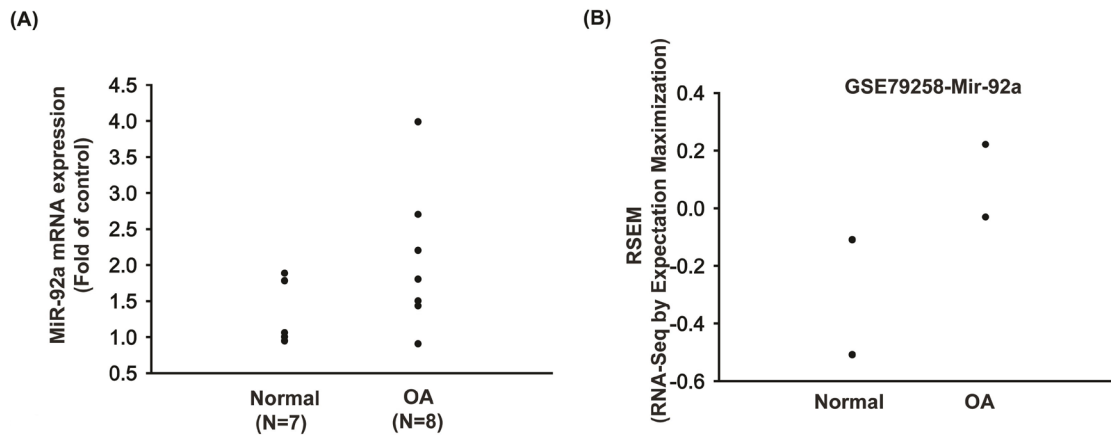

**Figure S3. The miR-92a expression in normal and OA patients.** (A) The miR-92a expression in normal and OA specimens were examined by qPCR. (B) Expression levels of miR-92a in paired normal and OA tissues retrieved from the GEO dataset records.
